# Supplementary material for: Efficient healing of diabetic wounds by MSC-EV-7A composite hydrogel via suppression of inflammation and enhancement of angiogenesis
Source: Royal Society of Chemistry journal article supplement (doi:10.1039/d3bm01904g), 2024-01-01
Supplement: d3bm01904g1.pdf [file d3bm01904g1.pdf]

## Supplementary materials

### Efficient healing of diabetic wound by MSC-EV-7A composite hydrogel via suppression of inflammation and enhancement of angiogenesis

S1

**Table1. Primers used for real-time PCR**

| Genes         |         | Primer sequences      |
|---------------|---------|-----------------------|
| IL-1 $\beta$  | Forward | CCACCTTTTGACAGTGATGA  |
|               | Reverse | GAGATTTGAAGCTGGATGCT  |
| IL-6          | Forward | GTCGGAGGCTTAATTACACA  |
|               | Reverse | TTTTCTGCAAGTGCATCATC  |
| TNF- $\alpha$ | Forward | CCCTCCAGAAAAGACACCAT  |
|               | Reverse | GCCACAAGCAGGAATGAGAAG |
| GAPDH         | Forward | CCACTCACGGCAAATTCAAC  |
|               | Reverse | CTCCACGACATACTCAGCAC  |
