# Supplementary material for: Efficient healing of diabetic wounds by MSC-EV-7A composite hydrogel via suppression of inflammation and enhancement of angiogenesis
Source: Royal Society of Chemistry journal article supplement (doi:10.1039/d3bm01904g), 2024-01-01
Supplement: d3bm01904g2.pdf [file d3bm01904g2.pdf]

## Efficient healing of diabetic wound by MSC-EV-7A composite hydrogel via suppression of inflammation and enhancement of angiogenesis

### Supplementary materials

S2

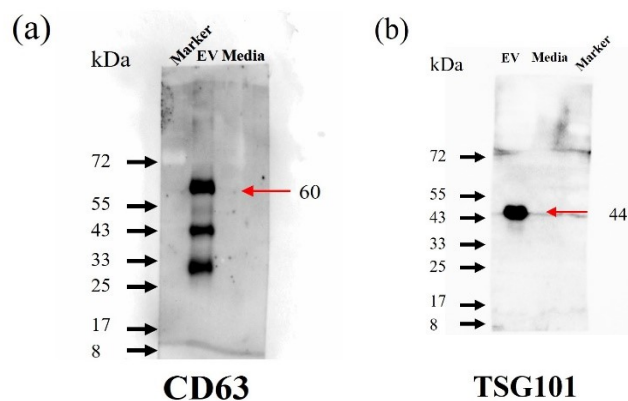

S2. Whole immuno blotting for expression of CD63(a) and TSG101(b) with protein molecular weight ladder showing bands from 8kDa to 72kDa.

S3

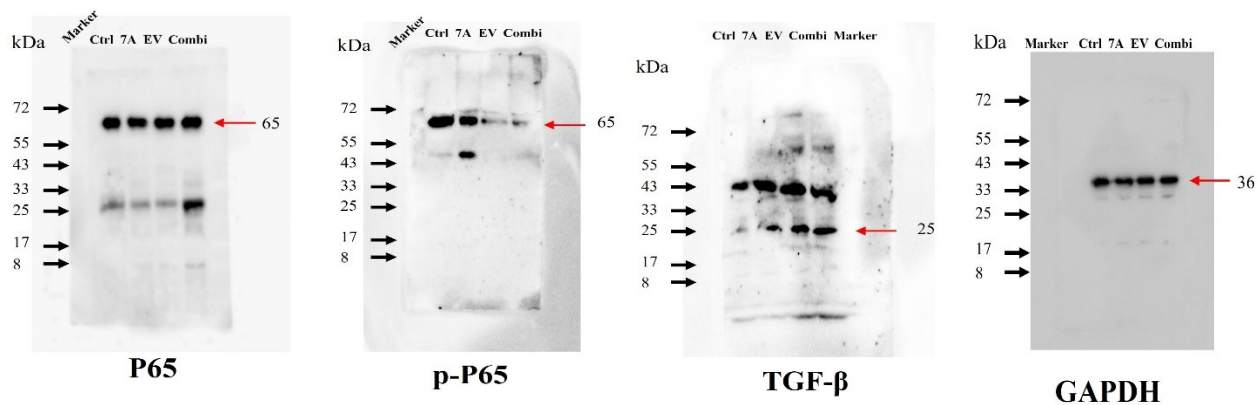

S3. Whole immuno blotting for expression of P65,p-P65,TGF- $\beta$  and GAPDH in skin tissues with protein molecular weight ladder showing bands from 8kDa to 72kDa .
